# Supplementary material
Source: PubMed Central journal article supplement (PMC3677258)
Supplement: supp_037473.112_Supplemental_Table_1.pdf [file supp_037473.112_Supplemental_Table_1.pdf]

**Table S1.** Description of the used transcriptome sequencing datasets

| Number | Tissue/cell line                                        | Type of reads | Read length (bp) | Number of reads | Reference |
|--------|---------------------------------------------------------|---------------|------------------|-----------------|-----------|
| 1      | Thyroid                                                 | Paired-end    | 50               | 81,912,887×2    | [1]       |
| 2      | Testes                                                  | Paired-end    | 50               | 81,836,199×2    | [1]       |
| 3      | Ovary                                                   | Paired-end    | 50               | 80,946,260×2    | [1]       |
| 4      | White blood cells                                       | Paired-end    | 50               | 81,217,148×2    | [1]       |
| 5      | Skeletal muscle                                         | Paired-end    | 50               | 82,111,139×2    | [1]       |
| 6      | Prostate                                                | Paired-end    | 50               | 82,334,076×2    | [1]       |
| 7      | Lymph node                                              | Paired-end    | 50               | 82,078,157×2    | [1]       |
| 8      | Lung                                                    | Paired-end    | 50               | 79,296,905×2    | [1]       |
| 9      | Adipose                                                 | Paired-end    | 50               | 77,300,072×2    | [1]       |
| 10     | Adrenal                                                 | Paired-end    | 50               | 74,472,871×2    | [1]       |
| 11     | Brain                                                   | Paired-end    | 50               | 73,513,047×2    | [1]       |
| 12     | Breast                                                  | Paired-end    | 50               | 75,862,215×2    | [1]       |
| 13     | Colon                                                   | Paired-end    | 50               | 82,437,443×2    | [1]       |
| 14     | Kidney                                                  | Paired-end    | 50               | 80,397,337×2    | [1]       |
| 15     | Heart                                                   | Paired-end    | 50               | 82,918,784×2    | [1]       |
| 16     | Liver                                                   | Paired-end    | 50               | 80,048,623×2    | [1]       |
| 17     | Brain                                                   | Single-end    | 100              | 58,578,322      | [2]       |
| 18     | Universal human reference RNAs                          | Single-end    | 100              | 70,105,327      | [2]       |
| 19     | Brain                                                   | Single-end    | 35               | 53,238,798      | [3]       |
| 20     | Universal human reference RNAs                          | Single-end    | 35               | 59,461,348      | [3]       |
| 21     | Airway epithelial cells from healthy non-smoker         | Paired-end    | 75               | 28,216,213×2    | [4]       |
| 22     | Airway epithelial cells from healthy smoker             | Paired-end    | 75               | 17,242,781×2    | [4]       |
| 23     | Airway epithelial cells from smoker without lung cancer | Paired-end    | 75               | 22,255,836×2    | [4]       |
| 24     | Airway epithelial cells from smoker with lung cancer    | Paired-end    | 75               | 20,930,670×2    | [4]       |
| 25     | Airway epithelial cells from healthy non-smoker         | Single-end    | 36               | 28,980,549      | [4]       |
| 26     | Airway epithelial                                       | Single-end    |                  | 30,338,829      |           |

|    |                                                         |            |    |            |     |
|----|---------------------------------------------------------|------------|----|------------|-----|
|    | cells from healthy smoker                               |            | 36 |            | [4] |
| 27 | Airway epithelial cells from smoker without lung cancer | Single-end | 36 | 26,944,931 | [4] |
| 28 | Airway epithelial cells from smoker with lung cancer    | Single-end | 36 | 27,780,650 | [4] |
| 29 | lymphoblastoid cell line (GSM424333)                    | Single-end | 50 | 45,479,557 | [5] |
| 30 | lymphoblastoid cell line (GSM424352)                    | Single-end | 50 | 40,635,780 | [5] |
| 31 | lymphoblastoid cell line (GSM424360)                    | Single-end | 50 | 41,111,682 | [5] |
| 32 | lymphoblastoid cell line (SRR032238)                    | Single-end | 50 | 38,424,688 | [5] |
| 33 | lymphoblastoid cell line (SRR032241)                    | Single-end | 50 | 36,665,036 | [5] |
| 34 | lymphoblastoid cell line (SRR032244)                    | Single-end | 50 | 41,089,776 | [5] |
| 35 | lymphoblastoid cell line (SRR032245)                    | Single-end | 50 | 43,291,432 | [5] |
| 36 | lymphoblastoid cell line (SRR032246)                    | Single-end | 50 | 45,169,846 | [5] |
| 37 | lymphoblastoid cell line (SRR032250)                    | Single-end | 50 | 38,657,782 | [5] |
| 38 | lymphoblastoid cell line (SRR032254)                    | Single-end | 50 | 63,260,299 | [5] |
| 39 | lymphoblastoid cell line (SRR032255)                    | Single-end | 50 | 38,441,615 | [5] |
| 40 | lymphoblastoid cell line                                | Single-end | 50 | 42,390,584 | [5] |

|    |                                                      |            |    |             |     |
|----|------------------------------------------------------|------------|----|-------------|-----|
|    | (SRR032256)                                          |            |    |             |     |
| 41 | lymphoblastoid cell line (SRR032263)                 | Single-end | 50 | 65,950,854  | [5] |
| 42 | lymphoblastoid cell line (SRR032266)                 | Single-end | 50 | 30,651,048  | [5] |
| 43 | lymphoblastoid cell line (SRR032267)                 | Single-end | 50 | 43,551,373  | [5] |
| 44 | lymphoblastoid cell line (SRR032269)                 | Single-end | 50 | 46,656,852  | [5] |
| 45 | lymphoblastoid cell line (SRR032271)                 | Single-end | 50 | 45,066,631  | [5] |
| 46 | lymphoblastoid cell line (SRR032273)                 | Single-end | 50 | 45,288,662  | [5] |
| 47 | Universal human reference RNA (SRR346465)            | Single-end | 51 | 37,981,706  | [6] |
| 48 | Human endometrial cancer cell line ECC-1 (SRR346473) | Single-end | 36 | 31,162,137  | [6] |
| 49 | Human endometrial cancer cell line ECC-1 (SRR346474) | Single-end | 36 | 26,653,273  | [6] |
| 50 | Human endometrial cancer cell line ECC-1 (SRR346475) | Single-end | 36 | 29,267,785  | [6] |
| 51 | Human endometrial cancer cell line ECC-1 (SRR346476) | Single-end | 50 | 104,354,358 | [6] |
| 52 | Human endometrial cancer cell line                   |            |    | 82,759,538  |     |

|    |                                            |            |     |              |     |
|----|--------------------------------------------|------------|-----|--------------|-----|
|    | cancer cell line<br>ECC-1<br>(SRR346477)   | Single-end | 50  |              | [6] |
| 53 | lymphoblastoid<br>cell line<br>(SRR324680) | Paired-end | 75  | 25,618,824×2 | [7] |
| 54 | lymphoblastoid<br>cell line<br>(SRR324681) | Paired-end | 75  | 25,503,829×2 | [7] |
| 55 | lymphoblastoid<br>cell line<br>(SRR324682) | Paired-end | 75  | 20,682,027×2 | [7] |
| 56 | lymphoblastoid<br>cell line<br>(SRR324683) | Paired-end | 75  | 22,006,296×2 | [7] |
| 57 | lymphoblastoid<br>cell line<br>(SRR324684) | Paired-end | 100 | 17,932,981×2 | [7] |
| 58 | lymphoblastoid<br>cell line<br>(SRR324685) | Paired-end | 100 | 13,786,194×2 | [7] |

## REFERENCES

1. Cabili MN, Trapnell C, Goff L, Koziol M, Tazon-Vega B, Regev A, Rinn JL. 2011. Integrative annotation of human large intergenic noncoding RNAs reveals global properties and specific subclasses. *Genes Dev* **25**: 1915-1927.
2. Chen G, Li R, Shi L, Qi J, Hu P, Luo J, Liu M, Shi T. 2011a. Revealing the missing expressed genes beyond the human reference genome by RNA-Seq. *BMC Genomics* **12**: 590.
3. Chen G, Yin K, Shi L, Fang Y, Qi Y, Li P, Luo J, He B, Liu M, Shi T. 2011b. Comparative analysis of human protein-coding and noncoding RNAs between brain and 10 mixed cell lines by RNA-Seq. *PLoS One* **6**: e28318.
4. Beane J, Vick J, Schembri F, Anderlind C, Gower A, Campbell J, Luo L, Zhang XH, Xiao J, Alekseyev YO et al. 2011. Characterizing the impact of smoking and lung cancer on the airway transcriptome using RNA-Seq. *Cancer Prev Res (Phila)* **4**: 803-817.
5. Toung JM, Morley M, Li M, Cheung VG. 2011. RNA-sequence analysis of human B-cells. *Genome Res* **21**: 991-998.
6. Gertz J, Varley KE, Davis NS, Baas BJ, Goryshin IY, Vaidyanathan R, Kuersten S, Myers RM. 2012. Transposase mediated construction of RNA-seq libraries. *Genome Res* **22**: 134-141.
7. Peng Z, Cheng Y, Tan BC, Kang L, Tian Z, Zhu Y, Zhang W, Liang Y, Hu X, Tan X et al. 2012. Comprehensive analysis of RNA-Seq data reveals extensive RNA editing in a human transcriptome. *Nat Biotechnol* **30**: 253-260.
